# Supplementary material
Source: ML conference proceedings conference paper supplement (https://proceedings.neurips.cc/paper_files/paper/2009/hash/1e6e0a04d20f50967c64dac2d639a577-Abstract.html)
Supplement: Supplementary file [file 1e6e0a04d20f50967c64dac2d639a577-Supplemental.zip]

---

# An Infinite Factor Model Hierarchy Via a Noisy-Or Mechanism: Supplemental Material

---

**Aaron C. Courville, Douglas Eck and Yoshua Bengio**

Department of Computer Science and Operations Research

University of Montréal

Montréal, Québec, Canada

`{courvila, eckdoug, bengioy}@iro.umontreal.ca`

In sampling from the infinite factor model hierarchy we require an expression for the posterior  $p(\nu_k^o \mid \nu_{k-1}^o, Y^+, z_{:, \geq k}^o = 0)$ . We first note that we will use the ARS sampling scheme and therefore only require the posterior density up to a normalizing constant. We decompose the posterior as follows:

$$p(\nu_k^o \mid \nu_{k-1}^o, Y^+, z_{:, \geq k}^o = 0) \propto P(z_{:, > k}^o = 0 \mid \nu_k^o, Y^+) P(z_{:, k}^o = 0 \mid \nu_k^o, Y^+) p(\nu_k^o \mid \nu_{k-1}^o) \quad (1)$$

The prior term is readily available from the stick breaking construction of the IBP [1]:  $p(\nu_k^o \mid \nu_{k-1}^o) = \alpha_\nu \nu_{k-1}^{-\alpha_\nu} \nu_k^{\alpha_\nu - 1} \mathbb{I}(0 \leq \nu_k \leq \nu_{k-1})$ . According to the noisy-or mechanism defined in Eq. 1 in the main document,  $z_{n,k}^o = 0$  implies that the binary trials associated with each (active)  $y_{n,k}^+ = 1$  failed. Thus we have the following expression for  $p(z_{:, k}^o = 0 \mid \nu_k^o, Y^+)$ :

$$\begin{aligned} P(z_{:, k}^o = 0 \mid \nu_k^o, Y^+) &= \prod_{j=1}^{J^+} \int P(z_{:, k}^o \mid V_{jk}, Y^+) p(V_{jk} \mid \nu_k^o) dV_{jk} \\ &= \prod_{j=1}^{J^+} \int_0^1 V_{jk}^{c\nu_k^o - 1} (1 - V_{jk})^{N_j} \frac{\Gamma(c+1)}{\Gamma(c\nu_k^o) \Gamma(c(1 - \nu_k^o) + 1)} dV_{jk} \\ &= \prod_{j=1}^{J^+} \frac{\Gamma(c+1)}{\Gamma(c+1 + N_j)} \frac{\Gamma(c(1 - \nu_k^o) + N_j + 1)}{\Gamma(c(1 - \nu_k^o) + 1)} \end{aligned}$$

Here  $J^+$  is the number of binary variables  $y_{:,j}$  active on any data example (those with at least one  $y_{ij} = 1$ , for at least one element  $i$ ). It remains to derive the expression for  $P(z_{:, > k}^o = 0 \mid \nu_k^o, Y^+)$ . From the standard stick-breaking construction of the IBP [1], given  $\nu_k^o, \nu_l^o$  and  $z_{n,l}$  (with  $l > k$ ) are conditionally i.i.d. across  $l$ . Therefore,

$$P(z_{:, > k}^o = 0 \mid \nu_k^o, Y^+) = \lim_{K \rightarrow \infty} \left( \int_0^{\nu_k^o} \frac{\alpha}{K} (\nu_k^o)^{-\alpha/K} \nu^{\alpha/K - 1} \prod_{j=1}^{J^+} \frac{\Gamma(c+1)}{\Gamma(c+1 + N_j)} \frac{\Gamma(c(1 - \nu) + N_j + 1)}{(c(1 - \nu)) \Gamma(c(1 - \nu))} \right)^{K-k} d\nu$$

For convenience, we define:  $F = \left[ \prod_{j=1}^{J^+} \frac{\Gamma(c+1)}{\Gamma(c+1 + N_j)} \right]$ . We now execute a change of variables. Letting  $\eta = \nu / \nu_k^o$  and the corresponding differential  $d\eta = 1/\nu_k^o d\nu$ , then:

$$\begin{aligned}
& P(z_{:, > k}^o = 0 \mid \nu_k^o, Y^+) \\
&= \lim_{K \rightarrow \infty} \left( \int_0^1 \frac{\alpha}{K} (\nu_k^o)^{-\alpha/K} (\eta \nu_k^o)^{\alpha/K-1} \nu_k^o \prod_{j=1}^{J^+} \frac{\Gamma(c+1)}{\Gamma(c+1+N_j)} \frac{\Gamma(c(1-\eta \nu_k^o) + N_j + 1)}{(c(1-\eta \nu_k^o))\Gamma(c(1-\eta \nu_k^o))} d\eta \right)^{K-k} \\
&= \lim_{K \rightarrow \infty} \left( \frac{\alpha}{K} F \int_0^1 \eta^{\alpha/K-1} \prod_{j=1}^{J^+} \frac{\Gamma(c(1-\eta \nu_k^o) + N_j + 1)}{(c(1-\eta \nu_k^o))\Gamma(c(1-\eta \nu_k^o))} d\eta \right)^{K-k} \\
&= \lim_{K \rightarrow \infty} \left( \frac{\alpha}{K} F \int_0^1 \eta^{\alpha/K-1} \prod_{j=1}^{J^+} \frac{1}{(c(1-\eta \nu_k^o))} \sum_{i'=0}^{N_j+1} (-1)^{N_j+1+i'} S_{N_j+1}^{(i')} (c(1-\eta \nu_k^o))^{i'} d\eta \right)^{K-k} \quad \text{with Stirling num. } S_{N_j+1}^{(i')} \\
&= \lim_{K \rightarrow \infty} \left( \frac{\alpha}{K} F \int_0^1 \eta^{\alpha/K-1} \prod_{j=1}^{J^+} \sum_{i=0}^{N_j} (-1)^{N_j+i} S_{N_j+1}^{(i+1)} (c(1-\eta \nu_k^o))^i d\eta \right)^{K-k} \quad \text{where } i = i' - 1 \text{ and } S_{N_j}^{(0)} = 0 \\
&= \lim_{K \rightarrow \infty} \left( \frac{\alpha}{K} F \int_0^1 \eta^{\alpha/K-1} \sum_{i=0}^{N_1+\dots+N_{J^+}} w_i c^i (1-\eta \nu_k^o)^i d\eta \right)^{K-k} \quad w_i \text{ is def. via the convolution of the Stirlings} \\
&= \lim_{K \rightarrow \infty} \left( \frac{\alpha}{K} F \sum_{i=0}^{N_1+\dots+N_{J^+}} w_i c^i \sum_{l=0}^i \binom{i}{l} (1-\nu_k^o)^l \frac{\Gamma(i-l+1)\Gamma(l+\alpha/K)}{\Gamma(i+\alpha/K+1)} \right)^{K-k} \\
&= \lim_{K \rightarrow \infty} \left( \frac{\alpha}{K} F \sum_{i=0}^{N_1+\dots+N_{J^+}} w_i c^i \left[ \frac{i!}{\prod_{n=0}^i (n+\alpha/K)} + \sum_{l=1}^i \frac{i! \prod_{m=0}^{l-1} (m+\alpha/K)}{l! \prod_{q=0}^i (q+\alpha/K)} (1-\nu_k^o)^l \right] \right)^{K-k} \\
&= \lim_{K \rightarrow \infty} \left( F \sum_{i=0}^{N_1+\dots+N_{J^+}} w_i c^i F \left[ 1 + \sum_{l=1}^i \frac{\alpha}{K} \frac{(1-\nu_k^o)^l}{l} \prod_{m=1}^{l-1} \left( 1 + \frac{\alpha}{mK} \right) \right] \right)^{K-k}
\end{aligned}$$

Applying l'Hôpital's rule and simplifying, we get:

$$\begin{aligned}
& P(z_{:, > k}^o = 0 \mid \nu_k^o, Y^+) \\
&= \exp \left( \left[ \alpha \prod_{j=1}^{J^+} \frac{\Gamma(c+1)}{\Gamma(c+1+N_j)} \right] \sum_{i=0}^{N_1+\dots+N_{J^+}} w_i c^i \left( -H_i + \left[ \sum_{l=1}^i \frac{(1-\nu_k^o)^l}{l} \right] \right) \right).
\end{aligned}$$

## References

- [1] Yee Whye Teh, Dilan Görür, and Zoubin Ghahramani. Stick-breaking construction for the indian buffet process. In *Proceedings of the Eleventh International Conference on Artificial Intelligence and Statistics (AISTAT 2007)*, 2007.
